# Supplementary material
Source: publisher site journal article supplement (https://www.dovepress.com/article/263759)
Supplement: Supplementary file 1 [file get_supplementary_file.php]

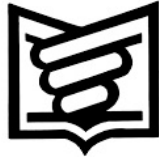

Mazandaran University of Medical Sciences

## Research Ethics Certificate

|                      |                                                                                                                                                                                                                                                                                                                                                                                                                                                                                                                                                                                                                                |                |            |
|----------------------|--------------------------------------------------------------------------------------------------------------------------------------------------------------------------------------------------------------------------------------------------------------------------------------------------------------------------------------------------------------------------------------------------------------------------------------------------------------------------------------------------------------------------------------------------------------------------------------------------------------------------------|----------------|------------|
| Approval ID:         | IR.MAZUMS.REC.1398.075                                                                                                                                                                                                                                                                                                                                                                                                                                                                                                                                                                                                         | Approval Date: | 2018-08-25 |
| Evaluated by:        | Mazandaran University of Medical Sciences                                                                                                                                                                                                                                                                                                                                                                                                                                                                                                                                                                                      |                |            |
| Status:              | Approved                                                                                                                                                                                                                                                                                                                                                                                                                                                                                                                                                                                                                       |                |            |
| Approval Statement:  | <p>The project was found to be in accordance to the ethical principles and the national norms and standards for conducting Medical Research in Iran.</p> <p>Notice:</p> <ol style="list-style-type: none"><li>1. Although the proposal has been approved by the research ethics committee, meeting the professional and legal requirements is the sole responsibility of the PI and other project collaborators.</li><li>2. This certificate is reliant on the proposal/documents received by this committee on 2018-08-25. The committee must be notified by the PI as soon as the proposal/documents are modified.</li></ol> |                |            |
| Thesis Title:        | Investigation of the relationship between overexpression of MexAB-OprM efflux pump and Class 1 Integrons with the emergence of Pseudomonas aeruginosa multi-drug resistant (MDR) clinical isolates in patients admitted to educational and therapeutic hospitals of Sari - 2018                                                                                                                                                                                                                                                                                                                                                |                |            |
| Thesis Adviser (PI): | Name: hamid reza goli<br>Email: h.goli@mazums.ac.ir                                                                                                                                                                                                                                                                                                                                                                                                                                                                                                                                                                            |                |            |
| Student:             | Name: leila ahmadian<br>Email: leila.ahmadian@yahoo.com                                                                                                                                                                                                                                                                                                                                                                                                                                                                                                                                                                        |                |            |

  
Dr. seyed abbas mousavi  
Director of University/Regional Research Ethics  
Committee  
Mazandaran University of Medical Sciences

  
Dr. majid saeedi  
Secretary of University/Regional Research Ethics  
Committee  
Mazandaran University of Medical Sciences
